# Supplementary material
Source: Springer Nature journal article supplement (https://www.springermedizin.de/resource/supplementary/12865_2008_242_MOESM8_ESM.pdf/9427582)

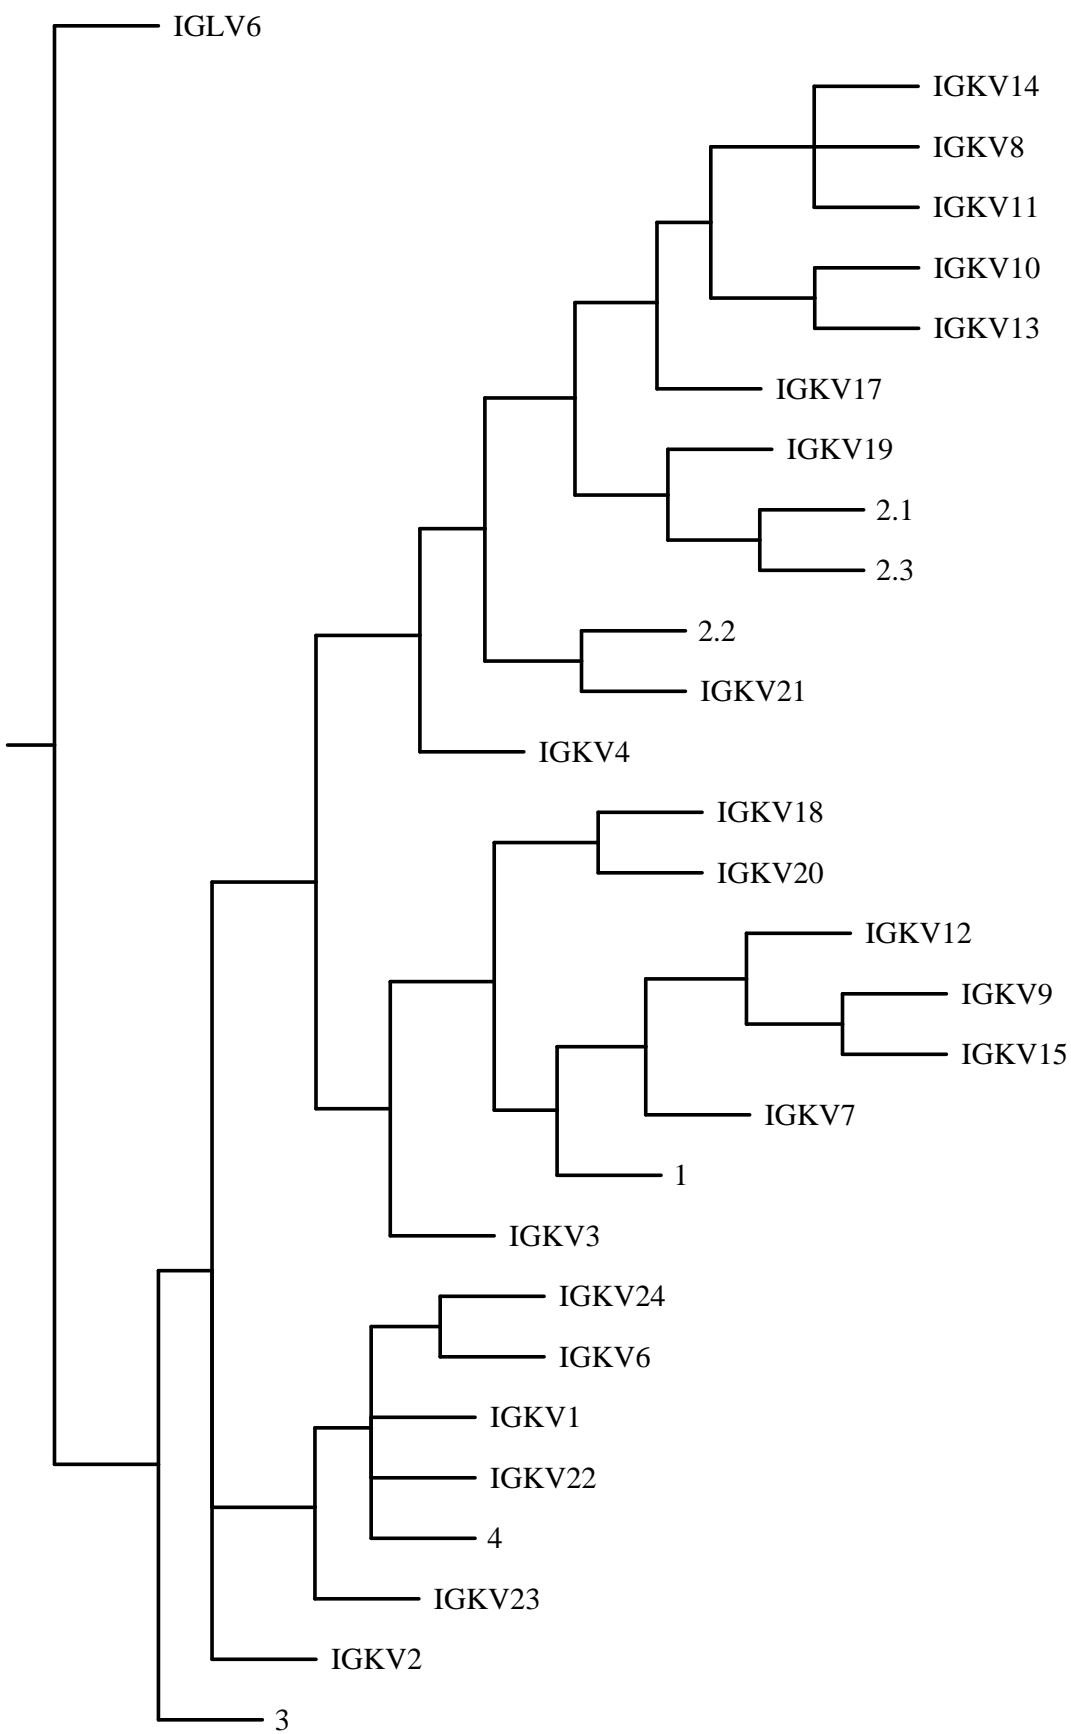

Supplement: MOESM8 [file 9427582]
